# Supplementary material for: Routine measurement of high-precision potassium stable isotope compositions using a continuous-flow Neoma MC-ICPMS/MS
Source: Royal Society of Chemistry journal article supplement (doi:10.1039/d4ja00211c), 2024-01-01
Supplement: d4ja00211c1.pdf [file d4ja00211c1.pdf]

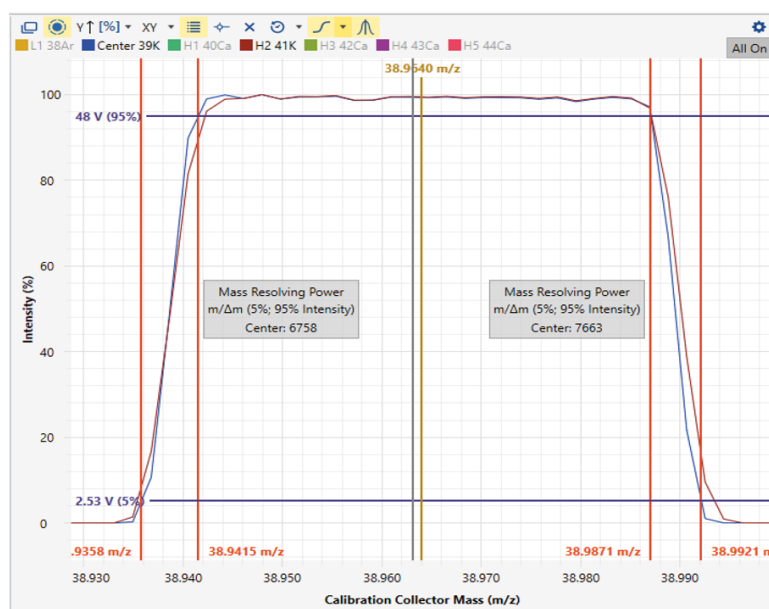

Figure S1

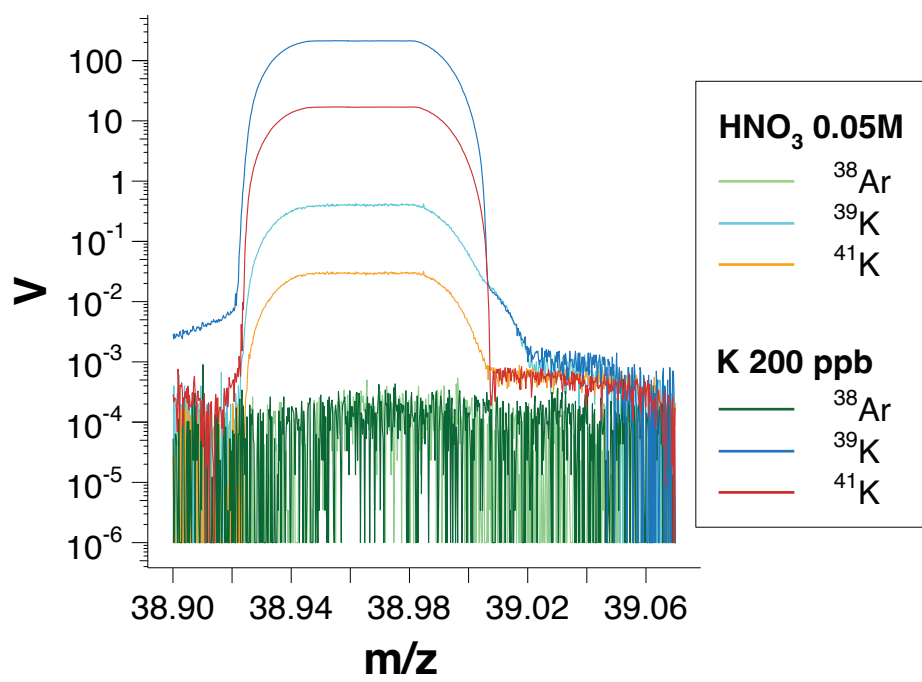

Figure S2

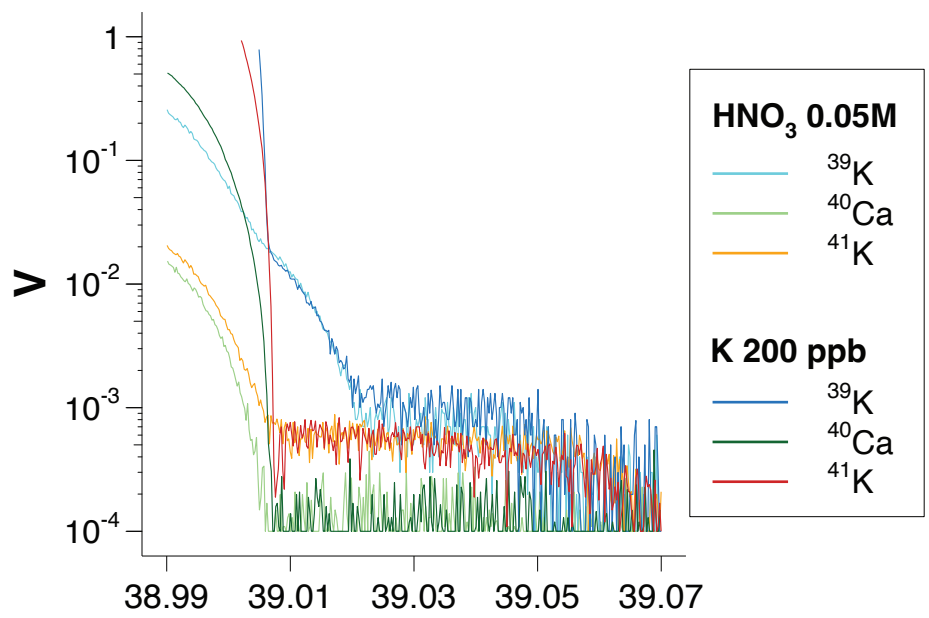

Figure S3

| RM        | Nature                 | Sample processed | $\delta^{41}\text{K} \pm 2 \text{ SD, } \text{‰}$ | n |
|-----------|------------------------|------------------|---------------------------------------------------|---|
| BCR1      | Basalt                 | 1                | $-0.42 \pm 0.10$                                  | 3 |
| BCR1      |                        | 2                | $-0.33 \pm 0.08$                                  | 2 |
| GA        | Granite                | 1                | $-0.48 \pm 0.09$                                  | 3 |
| GA        |                        | 1                | $-0.43 \pm 0.07$                                  | 6 |
| SRM 1577c | Bovine liver           | 1                | $0.17 \pm 0.08$                                   | 4 |
| SRM 1577c |                        | 2                | $0.14 \pm 0.07$                                   | 3 |
| DORM4     | Fish protein           | 1                | $-0.21 \pm 0.08$                                  | 4 |
| DORM4     |                        | 2                | $-0.26 \pm 0.03$                                  | 2 |
| BCR-383   | Green beans            | 1                | $-0.87 \pm 0.08$                                  | 3 |
| BCR-383   |                        | 1                | $-0.77 \pm 0.03$                                  | 4 |
| BCR-383   |                        | 2                | $-0.82 \pm 0.03$                                  | 3 |
| IAPSO     | Seawater               | 1                | $0.15 \pm 0.06$                                   | 4 |
| IAPSO     |                        | 2                | $0.03 \pm 0.09$                                   | 3 |
| ERM-CE464 | Tuna fsh               | 1                | 0.37                                              | 4 |
| ERM-CE464 |                        | 2                | 0.34                                              | 6 |
| TORT3     | Lobster hepatopancreas | 1                | $-0.27 \pm 0.04$                                  | 4 |
| TORT3     |                        | 2                | $-0.26 \pm 0.01$                                  | 2 |
| BCR-380   | Whole milk             | 1                | $0.08 \pm 0.09$                                   | 3 |
| BCR-380   |                        | 2                | $0.01 \pm 0.10$                                   | 3 |

Table S1
