# Supplementary material for: Routine measurement of high-precision potassium stable isotope compositions using a continuous-flow Neoma MC-ICPMS/MS
Source: Royal Society of Chemistry journal article supplement (doi:10.1039/d4ja00211c), 2024-01-01
Supplement: d4ja00211c2.pdf [file d4ja00211c2.pdf]

Fig. S1: Peak scan in the medium-resolution mode of the SRM-3141a solution at 200 ng/mL (K 200 ppb) using the set of parameters given in Table 1 showing the peak shape of the  $m/z$ -values 39 and 41 (blue and red, respectively) with the automated calculation of the resolution (5 95% of  $m/z$ -value 39) on the ascending edge of the peak.

Fig. S2: Peak scan in the low-resolution mode of the SRM-3141a solution at 200 ng/mL (K 200 ppb) using the set of parameters given in Table 1 showing the absence of  $^{38}\text{Ar}$ .

Fig. S3 Peak scan in the low-resolution mode of the SRM-3141a solution at 200 ng/mL (K 200 ppb) using the set of parameters given in Table 1 showing the absence of interference on  $^{40}\text{Ca}$ .

Table S1: Details of the K isotope composition ( $\delta^{41}\text{K}$ ) of the CRM measured in the present study with the number of replicated ion-chromatography procedures.
